# Supplementary material for: A VSV-based assay quantifies coronavirus Mpro/3CLpro/Nsp5 main protease activity and chemical inhibition
Source: PubMed Central journal article supplement (PMC9046202; doi:10.1038/s42003-022-03277-0), 2022-04-27
Supplement: 42003_2022_3277_MOESM3_ESM.pdf [file 42003_2022_3277_MOESM3_ESM.pdf]

## Description of Additional Supplementary Files

**File name:** Supplementary Data 1

**Description:** Data used to generate graphs of main figures.
